# Supplementary material
Source: PubMed Central journal article supplement (PMC8804743)
Supplement: sj-pdf-1-car-10.1177_19476035211029696.pdf [file sj-pdf-1-car-10.1177_19476035211029696.pdf]

**Supplementary Table S1.** Histological IVD scoring based on Tam et al.

| Genotype                                   | Part A (I)<br>NP structure | Part A (II)<br>NP clefts/fissures | Part B (I)<br>AF structure | Part B (II)<br>AF clefts/fissures | Part C<br>AF/NP<br>boundary | Total<br>score |
|--------------------------------------------|----------------------------|-----------------------------------|----------------------------|-----------------------------------|-----------------------------|----------------|
| WT 1                                       |                            |                                   |                            |                                   |                             |                |
| IVD 1                                      | 1                          | 1                                 | 1                          | 1                                 | 1                           | 5              |
| IVD 2                                      | 1                          | 1                                 | 1                          | 1                                 | 1                           | 5              |
| IVD 3                                      | 1                          | 1                                 | 1                          | 0                                 | 1                           | 4              |
| WT 2                                       |                            |                                   |                            |                                   |                             |                |
| IVD 1                                      | 1                          | 1                                 | 1                          | 0                                 | 1                           | 4              |
| IVD 2                                      | 1                          | 1                                 | 1                          | 0                                 | 1                           | 4              |
| IVD 3                                      | 1                          | 1                                 | 1                          | 0                                 | 0                           | 3              |
| WT 3                                       |                            |                                   |                            |                                   |                             |                |
| IVD 1                                      | 1                          | 1                                 | 1                          | 0                                 | 1                           | 4              |
| IVD 2                                      | 1                          | 1                                 | 1                          | 1                                 | 1                           | 5              |
| IVD 3                                      | 1                          | 1                                 | 1                          | 0                                 | 1                           | 4              |
| WT 4                                       |                            |                                   |                            |                                   |                             |                |
| IVD 1                                      | 1                          | 1                                 | 1                          | 1                                 | 1                           | 5              |
| IVD 2                                      | 1                          | 1                                 | 1                          | 0                                 | 1                           | 4              |
| IVD 3                                      | 1                          | 1                                 | 1                          | 1                                 | 1                           | 5              |
| WT 5                                       |                            |                                   |                            |                                   |                             |                |
| IVD 1                                      | 1                          | 1                                 | 1                          | 0                                 | 0                           | 3              |
| IVD 2                                      | 1                          | 1                                 | 1                          | 0                                 | 0                           | 3              |
| IVD 3                                      | 1                          | 1                                 | 1                          | 0                                 | 0                           | 3              |
| WT 6                                       |                            |                                   |                            |                                   |                             |                |
| IVD 1                                      | 1                          | 1                                 | 1                          | 0                                 | 1                           | 4              |
| IVD 2                                      | 1                          | 1                                 | 1                          | 0                                 | 0                           | 3              |
| IVD 3                                      | 1                          | 1                                 | 1                          | 0                                 | 1                           | 4              |
| Tnmd <sup>+/-</sup> 1                      |                            |                                   |                            |                                   |                             |                |
| IVD 1                                      | 1                          | 1                                 | 1                          | 1                                 | 1                           | 5              |
| IVD 2                                      | 2                          | 1                                 | 1                          | 1                                 | 1                           | 6              |
| IVD 3                                      | 1                          | 1                                 | 1                          | 1                                 | 1                           | 5              |
| Tnmd <sup>+/-</sup> KO 2                   |                            |                                   |                            |                                   |                             |                |
| IVD 1                                      | 2                          | 1                                 | 1                          | 1                                 | 1                           | 6              |
| IVD 2                                      | 2                          | 1                                 | 1                          | 1                                 | 1                           | 6              |
| IVD 3                                      | 1                          | 1                                 | 1                          | 1                                 | 1                           | 5              |
| Tnmd <sup>+/-</sup> KO 3                   |                            |                                   |                            |                                   |                             |                |
| IVD 1                                      | 1                          | 1                                 | 1                          | 1                                 | 1                           | 5              |
| IVD 2                                      | 1                          | 1                                 | 1                          | 1                                 | 1                           | 5              |
| IVD 3                                      | 1                          | 1                                 | 1                          | 0                                 | 1                           | 4              |
| Tnmd <sup>+/-</sup> KO 4                   |                            |                                   |                            |                                   |                             |                |
| IVD 1                                      | 1                          | 1                                 | 1                          | 1                                 | 1                           | 5              |
| IVD 2                                      | 1                          | 1                                 | 1                          | 1                                 | 1                           | 5              |
| IVD 3                                      | 1                          | 1                                 | 1                          | 1                                 | 1                           | 5              |
| Tnmd <sup>+/-</sup> KO 5                   |                            |                                   |                            |                                   |                             |                |
| IVD 1                                      | 1                          | 1                                 | 1                          | 1                                 | 1                           | 5              |
| IVD 2                                      | 1                          | 1                                 | 1                          | 0                                 | 1                           | 4              |
| IVD 3                                      | 1                          | 1                                 | 1                          | 1                                 | 1                           | 5              |
| Tnmd <sup>+/-</sup> KO 6                   |                            |                                   |                            |                                   |                             |                |
| IVD 1                                      | 1                          | 1                                 | 1                          | 0                                 | 1                           | 4              |
| IVD 2                                      | 1                          | 1                                 | 1                          | 1                                 | 1                           | 5              |
| IVD 3                                      | 1                          | 1                                 | 1                          | 0                                 | 1                           | 4              |
| Tnmd <sup>+/-</sup> /Chm1 <sup>+/-</sup> 1 |                            |                                   |                            |                                   |                             |                |
| IVD 1                                      | 2                          | 1                                 | 2                          | 1                                 | 1                           | 7              |
| IVD 2                                      | 2                          | 1                                 | 1                          | 1                                 | 1                           | 6              |
| IVD 3                                      | 2                          | 1                                 | 2                          | 1                                 | 1                           | 7              |
| Tnmd <sup>+/-</sup> /Chm1 <sup>+/-</sup> 2 |                            |                                   |                            |                                   |                             |                |
| IVD 1                                      | 2                          | 1                                 | 2                          | 1                                 | 1                           | 7              |
| IVD 2                                      | 2                          | 1                                 | 1                          | 1                                 | 1                           | 6              |
| IVD 3                                      | 2                          | 1                                 | 1                          | 1                                 | 1                           | 6              |
| Tnmd <sup>+/-</sup> /Chm1 <sup>+/-</sup> 3 |                            |                                   |                            |                                   |                             |                |
| IVD 1                                      | 1                          | 1                                 | 1                          | 1                                 | 1                           | 5              |
| IVD 2                                      | 2                          | 1                                 | 1                          | 1                                 | 1                           | 6              |
| IVD 3                                      | 2                          | 1                                 | 2                          | 1                                 | 1                           | 7              |
| Tnmd <sup>+/-</sup> /Chm1 <sup>+/-</sup> 4 |                            |                                   |                            |                                   |                             |                |
| IVD 1                                      | 2                          | 1                                 | 2                          | 1                                 | 2                           | 8              |
| IVD 2                                      | 2                          | 1                                 | 2                          | 1                                 | 1                           | 7              |
| IVD 3                                      | 2                          | 1                                 | 2                          | 1                                 | 1                           | 7              |
| Tnmd <sup>+/-</sup> /Chm1 <sup>+/-</sup> 5 |                            |                                   |                            |                                   |                             |                |
| IVD 1                                      | 2                          | 1                                 | 1                          | 1                                 | 1                           | 6              |
| IVD 2                                      | 2                          | 1                                 | 2                          | 1                                 | 1                           | 7              |
| IVD 3                                      | 2                          | 1                                 | 2                          | 1                                 | 1                           | 7              |
| Tnmd <sup>+/-</sup> /Chm1 <sup>+/-</sup> 6 |                            |                                   |                            |                                   |                             |                |
| IVD 1                                      | 1                          | 1                                 | 1                          | 1                                 | 1                           | 5              |
| IVD 2                                      | 2                          | 1                                 | 1                          | 1                                 | 1                           | 6              |
| IVD 3                                      | 2                          | 1                                 | 1                          | 1                                 | 1                           | 6              |
